# Supplementary material
Source: Springer Nature journal article supplement (https://www.springermedizin.de/resource/supplementary/13054_2011_527_MOESM3_ESM.pdf/9708594)

# Comparison of the incremental effects and costs of low molecular weight heparin versus unfractionated heparin for venous thromboembolism prophylaxis

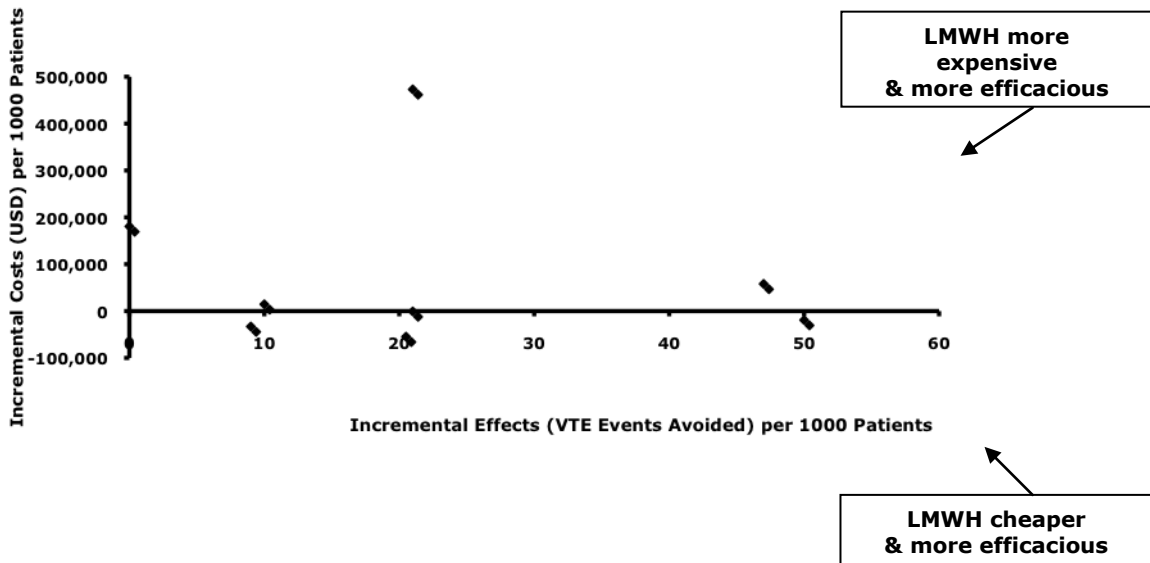

Supplement: MOESM3 [file 9708594]
